# Supplementary material for: The synthesis of porous ultrathin graphitic carbon nitride for the ultrasensitive fluorescence detection of 2,4,6-trinitrophenol in environmental water
Source: Royal Society of Chemistry journal article supplement (doi:10.1039/c9en01165j), 2019-11-26
Supplement: c9en01165j1.pdf [file c9en01165j1.pdf]

## Supporting Information

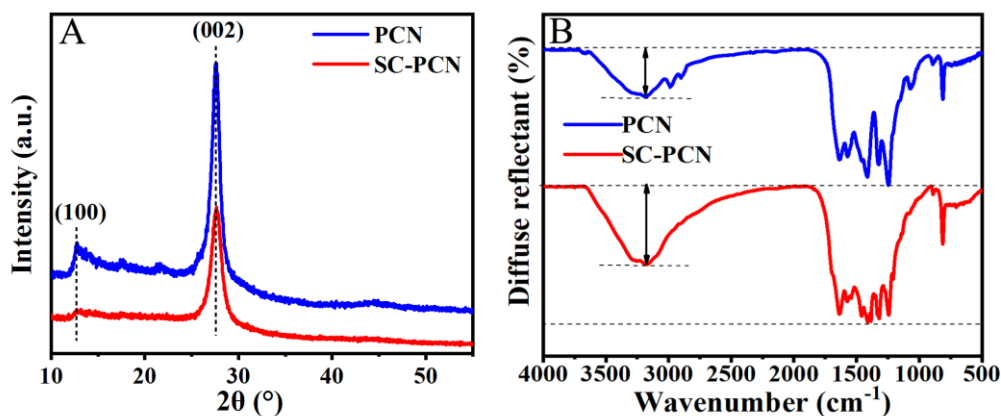

Fig. S1 XRD (A) and FT-IR (B) spectra of the PCN and SC-PCN.

Table S1 BET surface areas and corresponding pore sizes of different synthetic processes

| Samples | Processing step                           | BET Surface Area (m <sup>2</sup> g <sup>-1</sup> ) | Pore Size (nm) |
|---------|-------------------------------------------|----------------------------------------------------|----------------|
| 1       | Primary PCN                               | 171.7                                              | 7.3            |
| 2       | PCN treated with HNO <sub>3</sub>         | 74.2                                               | 8.5            |
| 3       | Primary SC-PCN                            | 222.3                                              | 9.6            |
| 4       | SC-PCN treated with HNO <sub>3</sub>      | 177.8                                              | 8.8            |
| 5       | SC-PCN with HNO <sub>3</sub> pretreatment | 178.0                                              | 8.9            |

Table S2 Organic elemental analysis of g-C<sub>3</sub>N<sub>4</sub> with different treating processes

| Sample                               | C(wt%) | N(wt%) | O(wt%) | H(wt%) |
|--------------------------------------|--------|--------|--------|--------|
| Primary PCN                          | 34.51  | 59.42  | 4.39   | 1.68   |
| Primary SC-PCN                       | 33.92  | 58.60  | 5.67   | 1.81   |
| SC-PCN treated with HNO <sub>3</sub> | 30.67  | 55.08  | 11.94  | 2.31   |

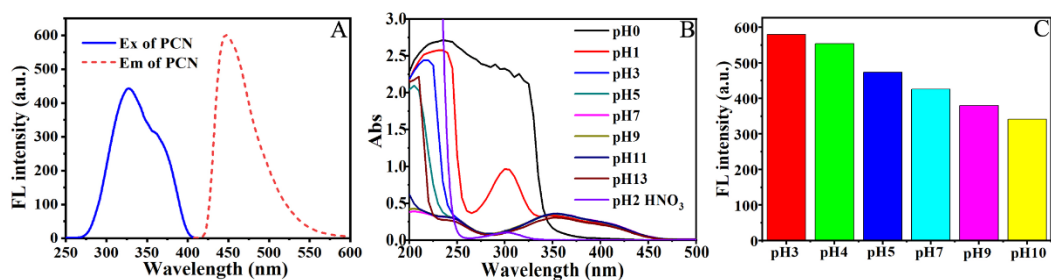

Fig. S2 (A) Fluorescence spectra of excitation and emission PCN. (B) UV-vis absorption spectra of HNO<sub>3</sub> and TNP in different pH values. (C) Fluorescence intensities of PCN in different pH values.

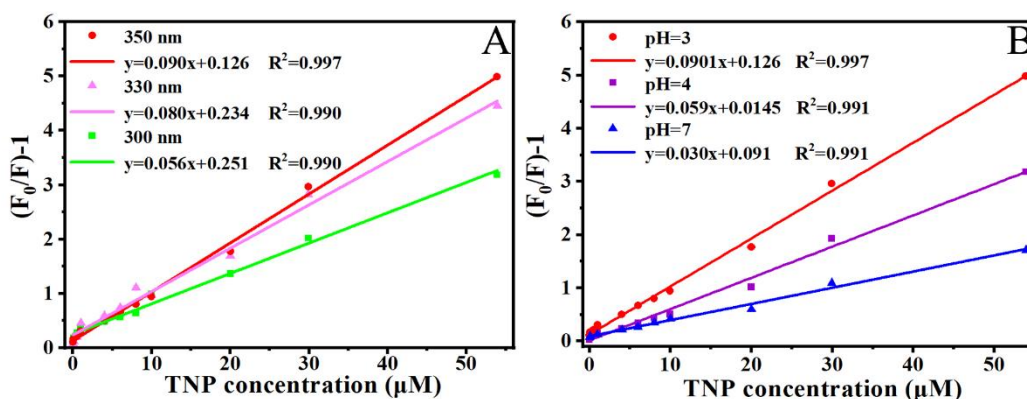

**Fig. S3** (A) Fluorescence determination of TNP by PCN in pH 3 with linearity range from 0.01 to 54  $\mu\text{M}$  at excitation wavelength of 300, 330 and 350 nm. (B) Fluorescence determination of TNP by PCN in different pH solutions (pH=3, 4 and 7) with linearity range from 0.01 to 54  $\mu\text{M}$  with excitation wavelength of 350 nm.

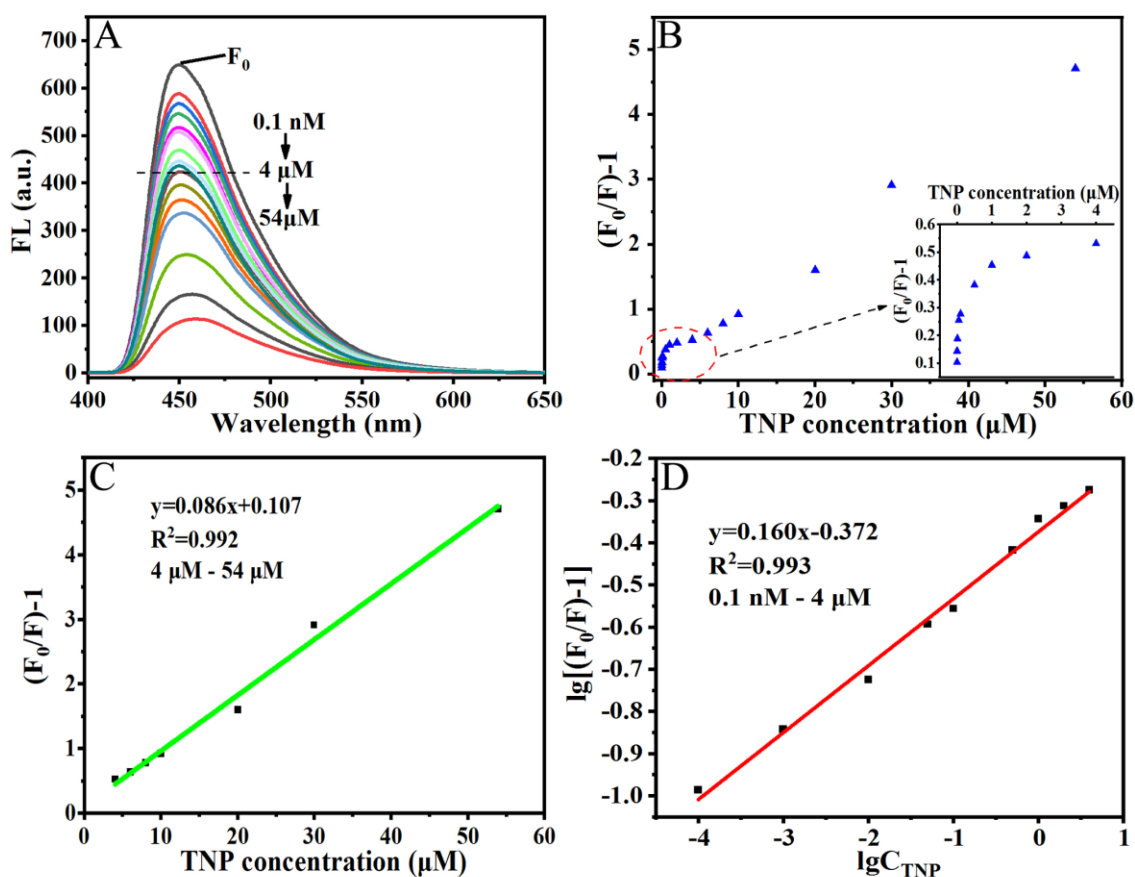

**Fig. S4** (A) The fluorescence spectra of SC-PCN in the presence of different concentrations of TNP in pH 7 (0.0001, 0.001, 0.01, 0.05, 0.1, 0.5, 1, 2, 4, 6, 8, 10, 20, 30, and 54  $\mu\text{M}$ ). (B) Fluorescence determination of TNP by SC-PCN in pH 7, with the magnification of determination for 0.1 nM-4  $\mu\text{M}$  as the inset. (C) Fluorescence determination of TNP by SC-PCN with linearity ranges from 4 to 54  $\mu\text{M}$  by normal SVE. (D) Fluorescence determination of TNP by SC-PCN with linearity ranges from 0.1 nM to 4  $\mu\text{M}$  by double logarithmic fitting of  $\lg[(F_0/F)-1]$  and  $\lg C_{\text{TNP}}$ .

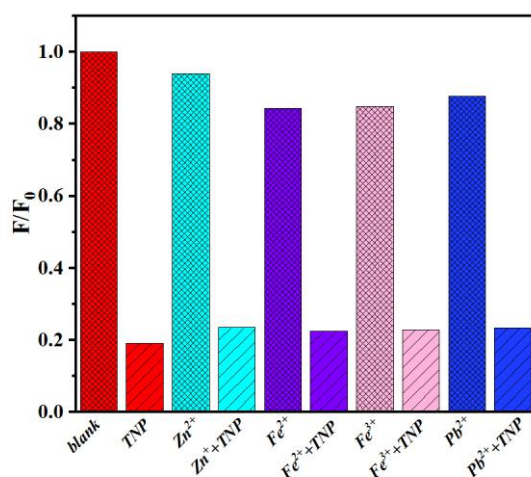

**Fig. S5** Fluorescence response of the SC-PCN in the presence of 10  $\mu\text{M}$  TNP and other co-existing metal ions.  $F_0$  and  $F$  represent the fluorescence intensity of SC-PCN in the absence and presence of TNP and other metal ions.

**Table S3** Parameters of adsorption kinetics fits for TNP adsorption

| Adsorbent | Temperature      | Pseudo-second-order kinetics |                                 |                                                 |       |
|-----------|------------------|------------------------------|---------------------------------|-------------------------------------------------|-------|
|           |                  | Equation                     | $Q_e$<br>( $\text{mg g}^{-1}$ ) | $k_2$<br>( $\text{g mg}^{-1} \text{min}^{-1}$ ) | $R^2$ |
| SC-PCN    | room temperature | $y=0.0153x+0.00159$          | 65.49                           | 0.15                                            | 0.997 |
| PCN       | room temperature | $y=0.0179x+0.0414$           | 55.99                           | 0.0077                                          | 0.998 |

**Table S4** Parameters of Henry, Freundlich fits for TNP adsorption

| Sample | Henry                          |        | Freundlich                     |      |        | Henry- Freundlich                |        |                                        |      |        |
|--------|--------------------------------|--------|--------------------------------|------|--------|----------------------------------|--------|----------------------------------------|------|--------|
|        | $K_h$<br>( $\text{L g}^{-1}$ ) | $R^2$  | $K_F$<br>( $\text{L g}^{-1}$ ) | N    | $R^2$  | Henry<br>(0-0.87 $\mu\text{M}$ ) |        | Freundlich<br>(0.87-44 $\mu\text{M}$ ) |      |        |
|        |                                |        |                                |      |        | $K_h$<br>( $\text{L g}^{-1}$ )   | $R^2$  | $K_F$<br>( $\text{L g}^{-1}$ )         | N    | $R^2$  |
| SC-PCN | 4.3661                         | 0.964  | 8.68                           | 1.19 | 0.9776 | 18.611                           | 0.9999 | 10.77                                  | 1.58 | 0.9957 |
| PCN    | 3.1399                         | 0.9961 | 3.88                           | 1.06 | 0.9987 | --                               |        |                                        |      |        |

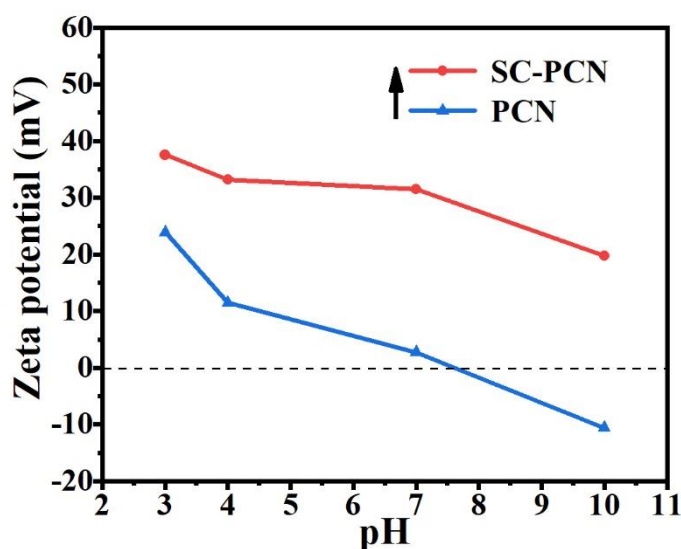

Fig. S6 Zeta potential measurements in different pH solutions by PCN and SC-PCN.

Table S5 Determination of TNP spiked in water samples (n=6)

| Water samples | Concentration added ( $\mu\text{M}$ ) | Concentration found ( $\mu\text{M}$ ) | Recovery (%) <sup>a</sup> | RSD (%) |
|---------------|---------------------------------------|---------------------------------------|---------------------------|---------|
| Sample 1      | 0.02                                  | 0.0236                                | 118.0                     | 10.03   |
|               | 1                                     | 0.946                                 | 94.6                      | 5.62    |
|               | 10                                    | 10.080                                | 100.8                     | 2.39    |
| Sample 2      | 0.02                                  | 0.0231                                | 115.5                     | 11.18   |
|               | 1                                     | 1.051                                 | 105.1                     | 5.75    |
|               | 10                                    | 10.020                                | 100.2                     | 2.48    |

<sup>a</sup> Recovery (%) =  $100 \times (\text{concentration found} / \text{concentration added})$ .

Table S6 Performance comparison with other reported methods for TNP sensing

| Methods                                                                              | Linear detection range                            | Detection limit     | Water samples                | Reference |
|--------------------------------------------------------------------------------------|---------------------------------------------------|---------------------|------------------------------|-----------|
| Silicon nanoparticles(SiNPs)                                                         | 0.087 -- 523 $\mu\text{M}$                        | 29 nM               | River and tap water          | 7         |
| Chemically oxidized and liquid exfoliated g-C <sub>3</sub> N <sub>4</sub> nanosheets | 0 -- 0.5 $\mu\text{M}$<br>0.5 -- 10 $\mu\text{M}$ | 8.2 nM              | Lake water and sea water     | 17        |
| Terbium-doped blue carbon dots                                                       | 500 nM -- 100 $\mu\text{M}$                       | 200 nM              | Running water and lake water | 10        |
| Fluorescence quantum dots ZnS:Mn <sup>2+</sup> @allyl mercaptan (QDs@AM)             | 0.22 -- 35 $\mu\text{M}$                          | 3.4nM               | Lake water                   | S1        |
| Cd-Metal-Organic                                                                     | 0 -- 40 $\mu\text{M}$                             | 1.3 $\mu\text{M}$   | --                           | 9         |
| Fluorescent method with                                                              | 0.218 -- 305 $\mu\text{M}$                        | 0.141 $\mu\text{M}$ | --                           | S2        |

|                                                         |                                 |         |                             |     |
|---------------------------------------------------------|---------------------------------|---------|-----------------------------|-----|
| 8-hydroxyquinoline Aluminum nanospheres                 |                                 |         |                             |     |
| Fluorescent method with MoS <sub>2</sub> quantum dots   | 0.099 -- 36.5 μM                | 95 nM   | Lake water                  | 6   |
| Carbon dots                                             | 0 -- 30 μM                      | 75.6 nM | --                          | S3  |
| Fluorescent method with phosphonated pyrene derivatives | 0 -- 35 μM                      | 61nM    | --                          | S4  |
| Luminescent graphene quantum dots (GQDs)                | 1 -- 60 μM                      | 0.3 μM  | Lake water                  | S5  |
| Zn(II)/Cd(II) mixed ligand coordination polymers (CPs)  | 0 -- 0.2 mM                     | 0.06 μM | --                          | S6  |
| Co(II)/Cd(II) Metal Organic Frameworks                  |                                 | 0.15μM  | ---                         | S7  |
| Boron nitride quantum dots (BNQDs).                     | 0.25 -- 200 μM                  | 0.14 μM | River water                 | S8  |
| Rotational paper-based microfluidic chips (RPADs)       | 17.2 -- 87.3 μM                 | 0.31μM  | Lake and sea water          | S9  |
| Hydrazine-substituted BODIPY probe                      | 0 -- 40 μM,<br>4 μM -- 54 μM    | 0.44 μM | --                          | S10 |
| This work                                               | 0.1 nM -- 4 μM<br>4 μM -- 54 μM | 0.04 nM | Ground water and lake water |     |

- S1 M. Bai, S. N. Huang, S. Y. Xu, G. F. Hu and L. Y. Wang, Fluorescent nanosensors via photoinduced polymerization of hydrophobic inorganic quantum dots for the sensitive and selective detection of nitroaromatics, *Anal. Chem.*, **2015**, 87, 2383–2388.
- S2 Y. X. Ma, H. Li, S. Peng and L. Y. Wang, Highly selective and sensitive fluorescent paper sensor for nitroaromatic explosive detection, *Anal. Chem.*, **2012**, 84, 8415–8421.
- S3 S. Md Palashuddin and C. Arun, Induction coil heater prepared highly fluorescent carbon dots as invisible ink and explosive sensor, *RSC Adv.*, **2014**, 4, 31994–31999.
- S4 N. Venkatramaiah, A. D. G. Firmino, F. A. Almeida Paz and J. P. C. Tomé, Fast detection of nitroaromatics using phosphonate pyrene motifs as dual chemosensors, *Chem. Commun.*, **2014**, 50, 9683–9686.
- S5 L. P. Lin, M. C. Rong, S. S. Lu, X. H. Song, Y. X. Zhong, J. W. Yan, Y. R. Wang, X. Chen, A facile synthesis of highly luminescent nitrogen-doped graphene quantum dots for the detection of 2,4,6-trinitrophenol in aqueous solution, *Nanoscale*, **2015**, 7, 1872–1878.
- S6 B. Parmar, Y. Rachuri, K. K. Bisht, R. Laiya and E. Suresh, Mechanochemical and conventional synthesis of Zn(II)/Cd(II) luminescent coordination polymers: dual sensing probe for selective detection of chromate anions and TNP in aqueous phase, *Inorg. Chem.*, **2017**, 56, 2627–2638.
- S7 Y. Rachuri, B. Parmar and E. S. Cryst, Three-dimensional Co(II)/Cd(II) metal–organic frameworks: luminescent Cd-MOF for detection and adsorption of 2,4,6-trinitrophenol in the aqueous phase, *Growth Des.*, **2018**, 18, 3062–3072.
- S8 D. Peng, L. Zhang, F. F. Li, W. R. Cui, R. P. Liang and J. D. Qiu, Facile and green approach to the synthesis of boron nitride quantum dots for 2,4,6-trinitrophenol sensing, *ACS Appl. Mater. Interfaces*, **2018**, 10, 7315–7323.
- S9 J. Qi, B. W. Li, X. Y. Wang, L. W. Fu, L. Q. Luo and L. X. Chen, Rotational paper-based microfluidic-chip device for multiplexed and simultaneous fluorescence detection of phenolic pollutants based on a

molecular-imprinting technique, *Anal. Chem.*, **2018**, 90, 11827–11834.

- S10 J. M. Gao, X. X. Chen, S. Q. Chen, H. Meng, Y. Wang, C. S. Li and L. Feng, The BODIPY-based chemosensor for fluorometric/colorimetric dual channel detection of RDX and PA, *Anal. Chem.*, **2019**, DOI:10.1021/acs.analchem.9b02888.
